# Supplementary material
Source: publisher figshare collection journal article supplement (https://karger.figshare.com/ndownloader/files/36564339)
Supplement: Supplementary file 1 [file 36564339]

**Supplementary Table 1.** Characteristics of individuals who participated in urine testing versus those who did not participate

|  | Urine testing | |
| --- | --- | --- |
|  | Participants | Not participated |
| N | 6,425 | 33,336 |
| Male sex, n (%) | 3,150 (49.0) | 15,743 (47.2) |
| Age, years | 68.4 ± 9.8 | 62.8 ± 13.2 |
| Self-reported diabetes, n (%) | 556 (8.7) | 2,758 (8.3) |
| Self-reported hypertension, n (%) | 1,791 (27.9) | 7,698 (23.1) |
| History of stroke, n (%) | 222 (3.5) | 1,087 (3.3) |
| History of heart diseases*, n (%) | 409 (6.4) | 1,853 (5.6) |

Values are shown in mean ± standard deviation, or the number (%). *Heart diseases includes miocardinal infarction, angina pectoris, heart failure, atrial fibrillation, and other heart diseases.
